# Supplementary material
Source: PubMed Central journal article supplement (PMC9479038)
Supplement: bloodBLD2021015303-suppl1.pdf [file bloodBLD2021015303-suppl1.pdf]

## Supplementary Methods

CMR was performed on 1.5T scanners. Vectorcardiographic gated sequences were performed in the ventricular long and short axis planes for chamber sizes, ejection fraction, and ventricular mass. Late gadolinium enhancement (LGE) imaging was performed with a standard phase sensitive inversion recovery sequence protocol 10 minutes after injection with gadolinium-DTPA. ECV was measured from T1 maps acquired with a modified Look-Locker inversion recovery (MOLLI) sequence in the short and long axis planes before and 10 minutes after contrast injection. ECV was calculated by the formula:  $ECV = (1 - \text{hematocrit}) \times (\Delta R1_{\text{myocardium}} / \Delta R1_{\text{blood}})$ , where R is relaxation time.

Cardiac chambers and function were assessed by transthoracic echocardiography. Peak mitral inflow velocities at early (E) and late filling (A) were measured by pulsed-wave Doppler. Mitral valve annular velocities in early (e') and late diastole (a') at both the septal and lateral annulus were measured by tissue Doppler imaging. Peak tricuspid regurgitant jet velocity (TRV) was quantified by continuous-wave Doppler sampling., modified for sickle cell patients as we previously reported (Supplementary table).

**Supplemental Table 1.**

| Subject ID | Age at time of echocardiography | LA volume (mL/m <sup>2</sup> ) | TRV (m/sec) | Lateral e' (cm/sec) | Lateral E/e' | E/A ratio | Diastolic Classification |
|------------|---------------------------------|--------------------------------|-------------|---------------------|--------------|-----------|--------------------------|
| CCH01      | 11                              | 16.9                           | 2.63        | 17.8                | 5.7          | 1.7       | Normal                   |
| CCH02      | 17                              | 10.8                           | 2.36        | 13.5                | 6.8          | 1.4       | Normal                   |
| CCH03      | 8                               | 26.8                           | 2.91        | 14.7                | 9.7          | 2.5       | Inconclusive             |
| CCH04      | 7                               | 27.1                           | 2.29        | 24.6                | 4.8          | 2.2       | Normal                   |
| CCH05      | 7                               | 26                             | 2.06        | 21.3                | 5.8          | 1.9       | Normal                   |
| CHL01      | 20                              | 23.9                           | 2.6         | 22.9                | 6.1          | 2.2       | Normal                   |
| CHL02      | 21                              | 33.7                           | 2.3         | 13.4                | 9            | 1.4       | Normal                   |
| CHL03      | 21                              | 32.4                           | 2.65        | 17                  | 8            | 2.2       | Normal                   |
| CHL04      | 14                              | 27.4                           | 1.78        | 20.7                | 7.5          | 2.1       | Normal                   |
| CHL05      | 17                              | 27.4                           | 1.78        | 20.7                | 7.5          | 2.4       | Normal                   |
| CHL06      | 11                              | 35.2                           | 2.2         | 15.7                | 7.8          | 2.8       | Inconclusive             |
| CHL07      | 16                              | 32                             | 2.4         | 16.3                | 6.7          | 2.1       | Normal                   |

LA: left atrium; TRV: tricuspid regurgitant jet velocity

Values in red denote abnormal value for age.

Patients were considered to have diastolic dysfunction if they had LA enlargement (LA volume index  $\geq 34$  mL/m<sup>2</sup> for adults or  $>2$ SD above mean for age) in addition to abnormal e' ( $<2$  SD below the mean for age, gender, and body size) and E/e' ratio ( $>2$  SD above the mean for age, gender, and body size).

**Supplementary Table 2.**

| <b>CMR measure or laboratory result</b>            | <b>No early therapy<br/>(N=25)</b> | <b>Early therapy<br/>(N=12)</b> |
|----------------------------------------------------|------------------------------------|---------------------------------|
| Age (years)                                        | 23 ± 13                            | 16.9 ± 7.2                      |
| Sex (F, M)                                         | (14, 11)                           | (8, 4)                          |
| LV end-diastolic volume index (ml/m <sup>2</sup> ) | 111.2 ± 23.2                       | 92.2 ± 15.8                     |
| LV mass index (g/m <sup>2</sup> )                  | 65.9 ± 18.3                        | 57.5 ± 11.5                     |
| LV cardiac index (L/min/m <sup>2</sup> )           | 5 ± 1.2                            | 3.7 ± 1.4 <sup>§</sup>          |
| Ejection fraction (%)                              | 59.2 ± 2.4                         | 63 ± 4.5                        |
| Hemoglobin (g/dL)                                  | 9.7 ± 1.5                          | 9.8 ± 1.1                       |
| Reticulocyte count (%)                             | 8.3 ± 5.2                          | 9.3 ± 6.4                       |
| Hematocrit (%)                                     | 0.28 ± 0.04                        | 0.29 ± 0.03                     |
| Total bilirubin (mg/dL)                            | 2.4 ± 1.5                          | 2.7 ± 1.4                       |
| Lactate dehydrogenase (U/L)                        | 556 ± 267                          | 691 ± 504 <sup>&amp;</sup>      |
| NT-proBNP (pg/mL)                                  | 127.1 ± 182.8                      | 69.5 ± 56 <sup>§</sup>          |

<sup>§</sup> data is missing on one participant

<sup>&</sup> data is missing on 3 participants

None of the differences were statistically significant
